# Supplementary material for: [{(Mo)Mo5O21(H2O)3(SO4)}12(VO)30(H2O)20]36–: A molecular quantum spin icosidodecahedron
Source: Royal Society of Chemistry journal article supplement (doi:10.1039/b504491j), 2005-01-01
Supplement: b504491j.pdf [file b504491j.pdf]

**$[\{(\text{Mo})\text{Mo}_5\text{O}_{21}(\text{H}_2\text{O})_3(\text{SO}_4)\}_{12}(\text{VO})_{30}(\text{H}_2\text{O})_{20}\}^{36-}$ : A molecular quantum spin icosidodecahedron**

**Bogdan Botar,<sup>\*a</sup> Paul Kögerler<sup>\*b</sup> and Craig L. Hill<sup>\*a</sup>**

<sup>a</sup> Department of Chemistry, Emory University, Atlanta, GA, USA 30322. E-mail: [bbotar@emory.edu](mailto:bbotar@emory.edu); [chill@emory.edu](mailto:chill@emory.edu)

<sup>b</sup> Ames Laboratory, Iowa State University, Ames, IA 50011, USA. E-mail: [kogerler@ameslab.gov](mailto:kogerler@ameslab.gov)

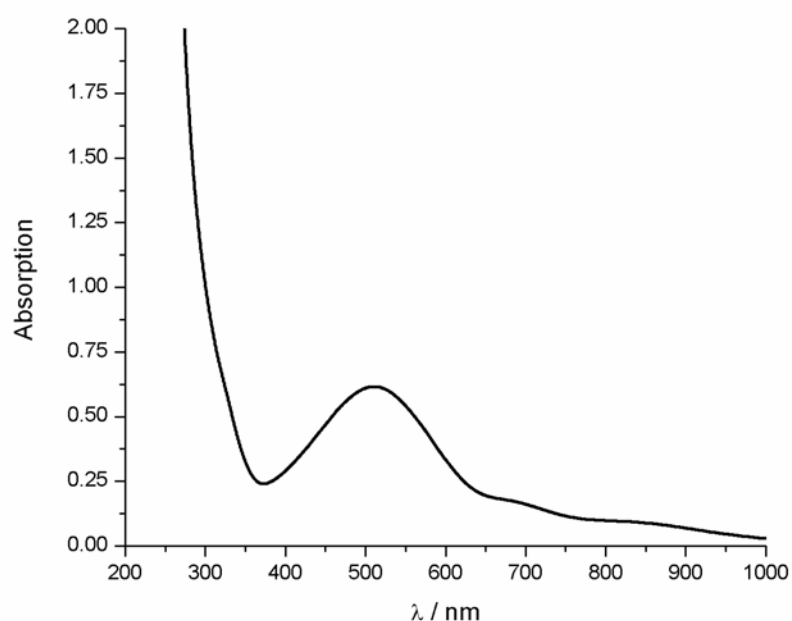

**Fig. S1** Electronic absorption spectrum of **1** in water (pH 2.5).

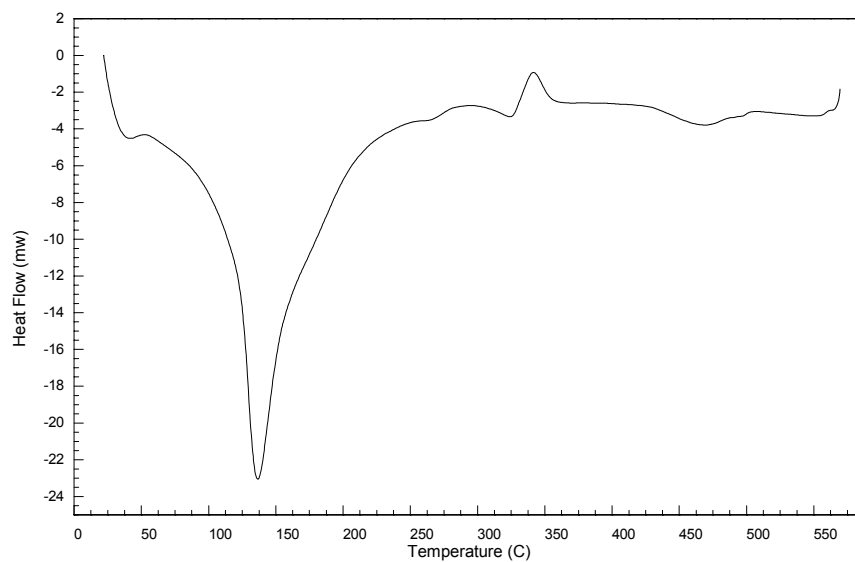

**Fig. S2** Differential scanning calorimetry (DSC) data of **1**. Crystalline samples (10 mg) heated from 25 °C to 570 °C at a rate of 20 °C/min.

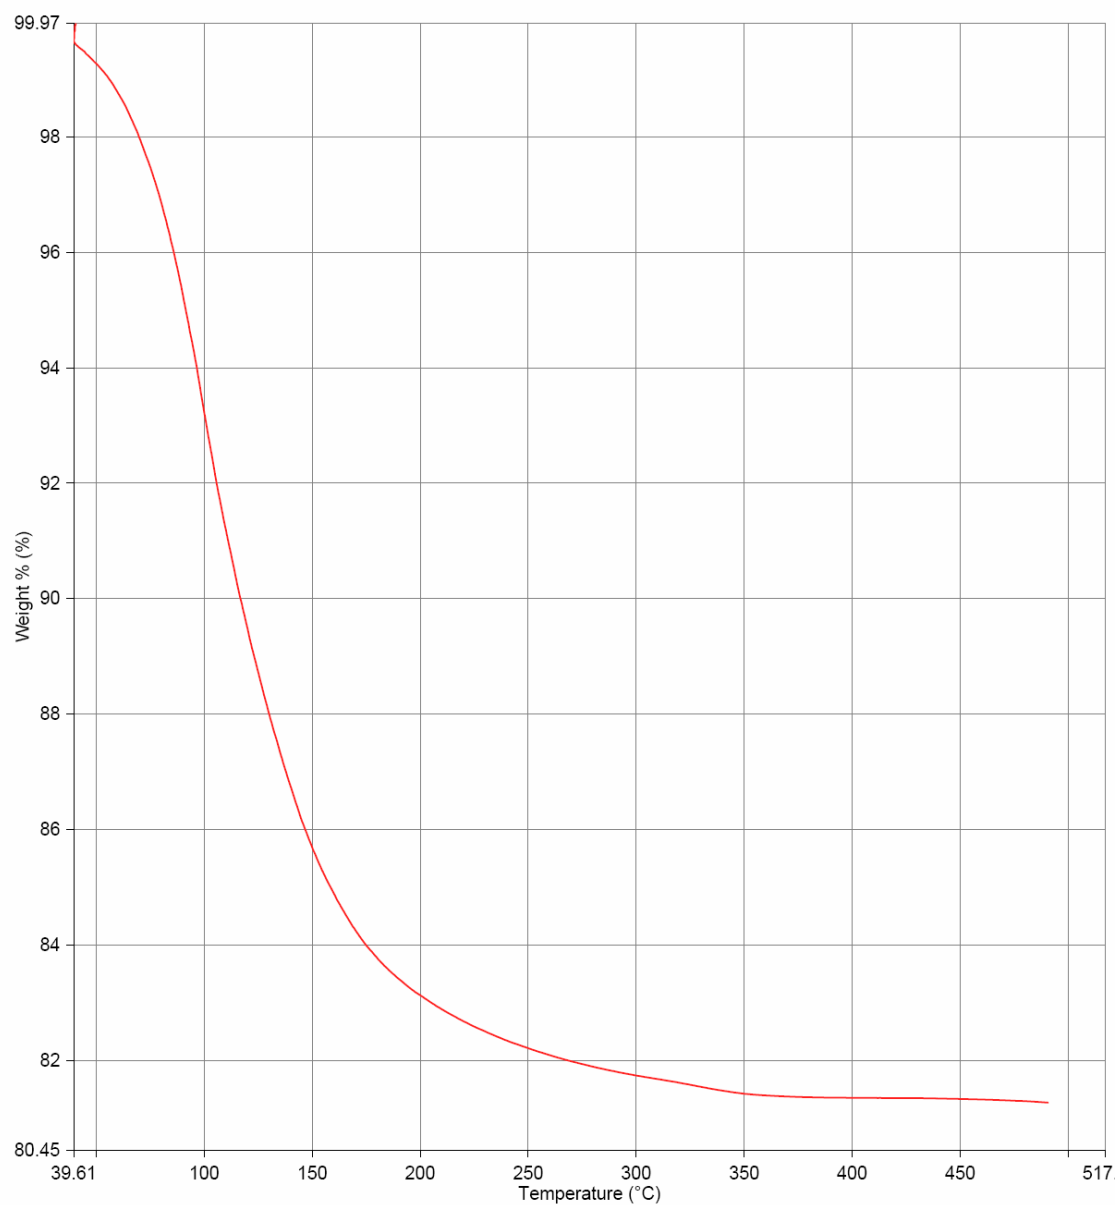

**Fig. S3** Thermogravimetric data for **1** (28.193 mg, heating rate: 10 °C/min, N<sub>2</sub>).

**Potentiometric titrations:**

Fifteen samples were dissolved in 0.5 M H<sub>2</sub>SO<sub>4</sub> containing excess (NH<sub>4</sub>)<sub>2</sub>Ce<sup>IV</sup>(NO<sub>3</sub>)<sub>6</sub> at 60-70 °C and back-titrated with 0.1 M NaNO<sub>2</sub>. This resulted in a sharp drop in the potential (typically from 1250 to 850 mV) at the equivalence point.

**Crystallographic data:**

One S atom was found to be distributed over three sites (S6, S7 and S8) with the total occupancy of 1.0. Some Mo atoms show the commonly observed O=Mo-OH<sub>2</sub> ↔ H<sub>2</sub>O-Mo=O disorder, present in nearly all giant polyoxomolybdate species. Some K atoms and water molecules of crystallization were disordered and were refined with partial occupancies based on their large thermal parameters.
